# Supplementary material for: G‐alpha interacting protein interacting protein, C terminus 1 regulates epileptogenesis by increasing the expression of metabotropic glutamate receptor 7
Source: PubMed Central journal article supplement (PMC8673704; doi:10.1111/cns.13746), 2021-10-22
Supplement: CNS-28-126-s001.pdf [file CNS-28-126-s001.pdf]

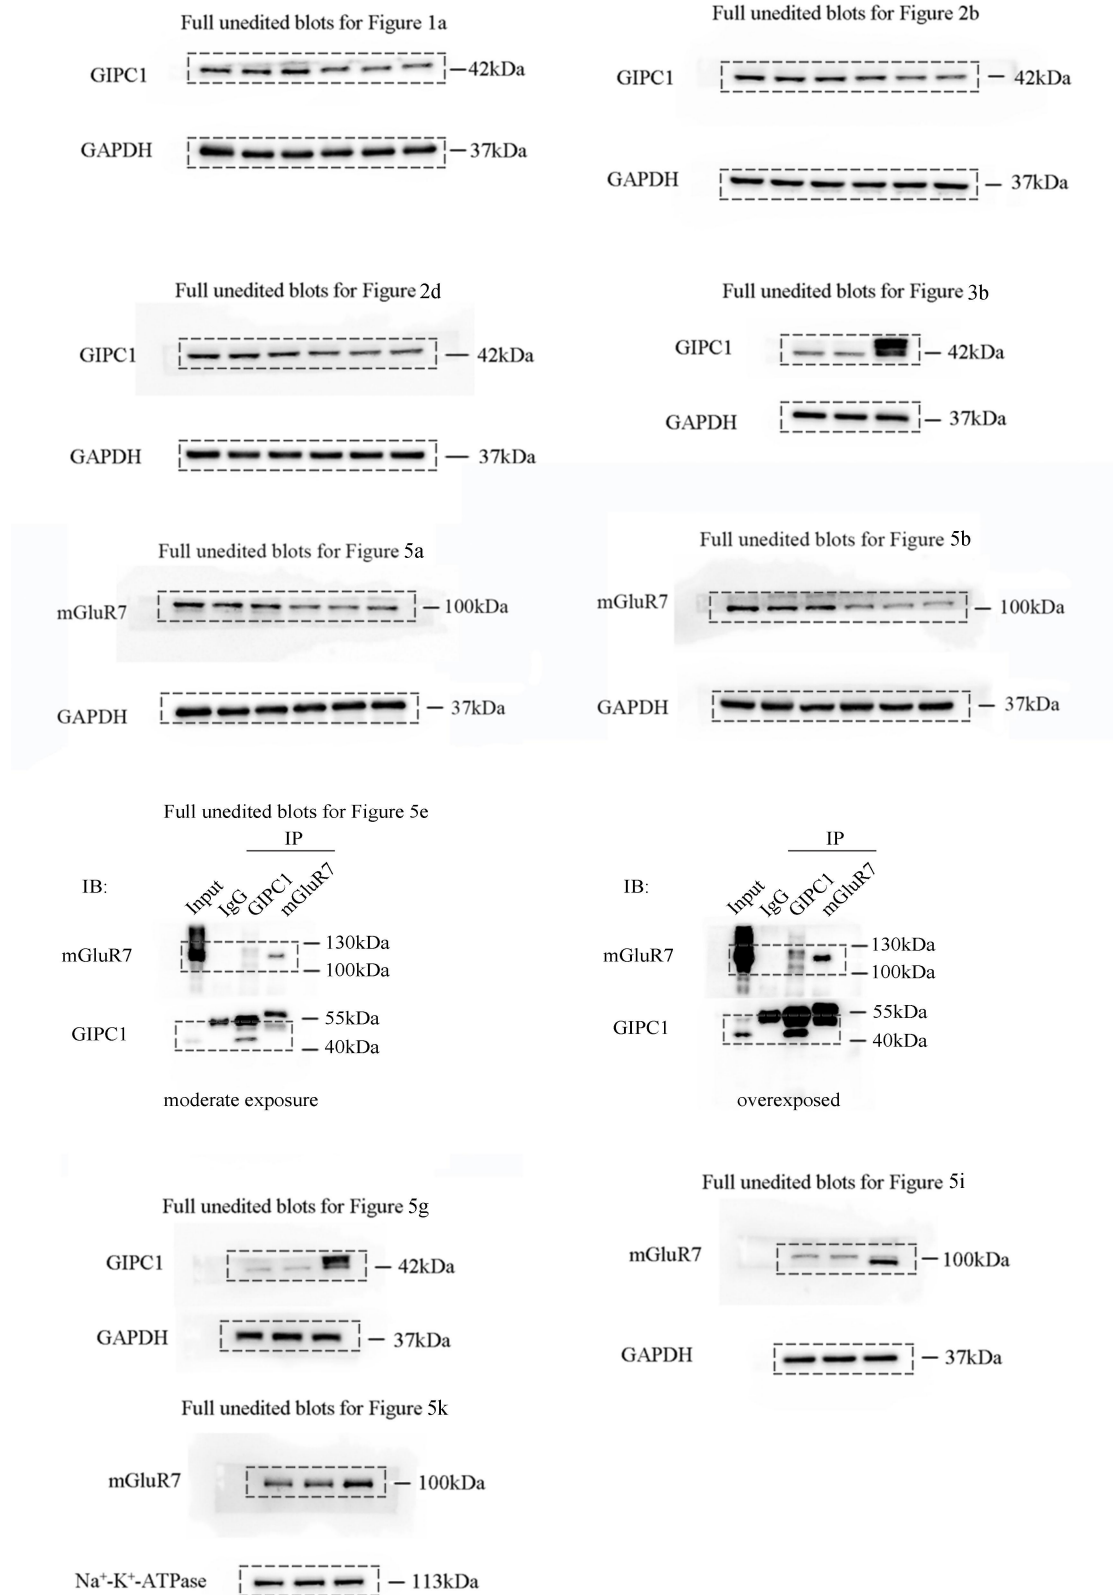

Figure S1. Uncropped images of Western blots.
